# Supplementary material for: The Effect of Compost and Fly Ash Treatment of Contaminated Soil on the Immobilisation and Bioavailability of Lead
Source: MDPI journal article supplement (doi:10.3390/agronomy11061188), 2021-06-10
Supplement: s1 [file s1]

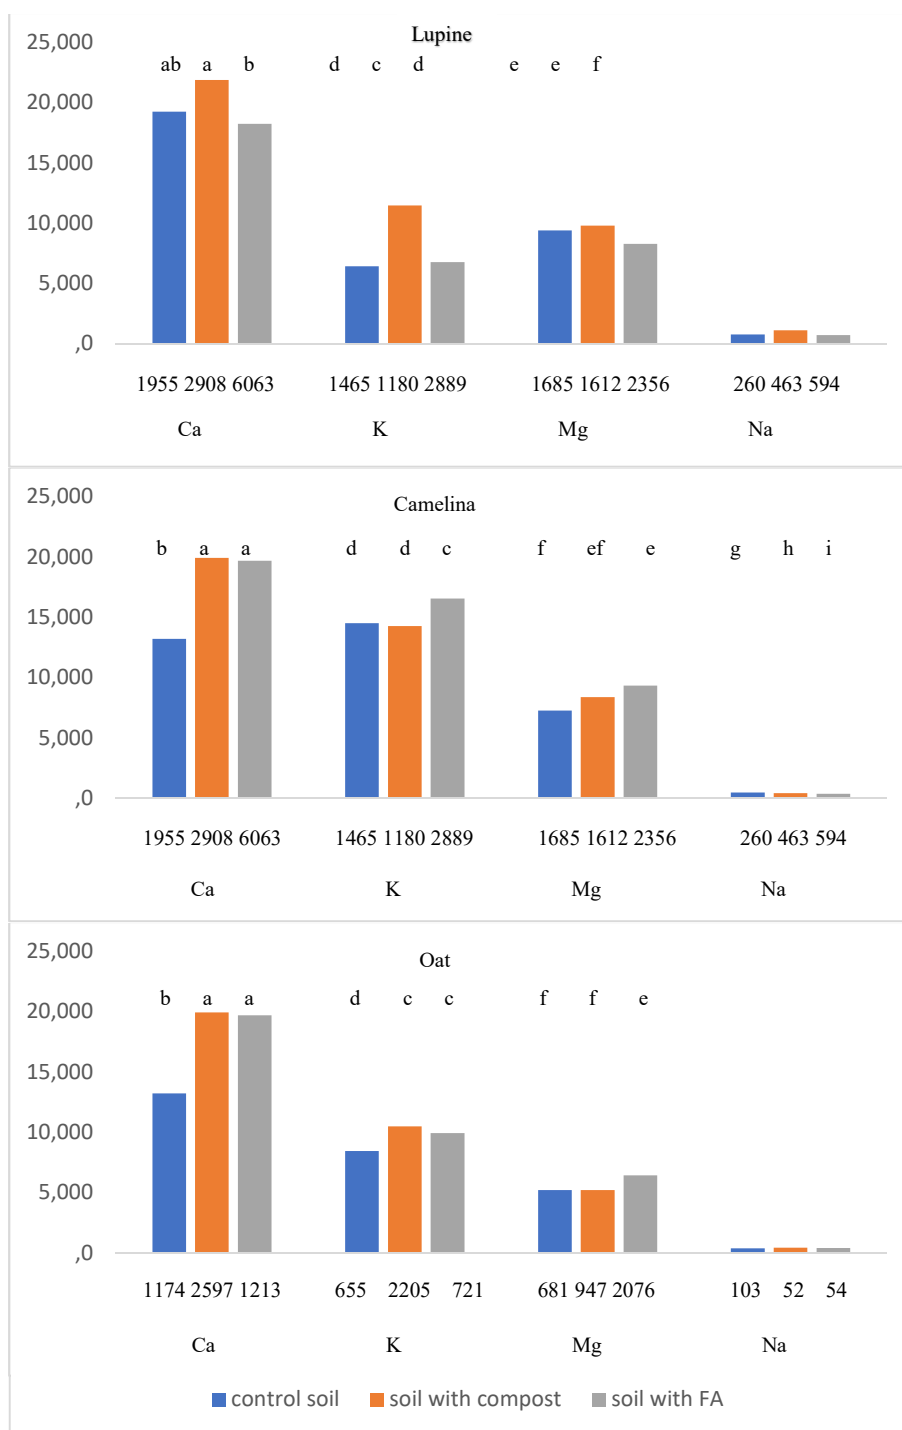

**Figure S1.** The effect of treating the soil with two amendments on mean Ca, K, Mg and Na amounts in plants. On the figure, the letters denote belonging to homogenous groups and numbers mean SD values.
