# Supplementary material for: The Effect of Compost and Fly Ash Treatment of Contaminated Soil on the Immobilisation and Bioavailability of Lead
Source: MDPI journal article supplement (doi:10.3390/agronomy11061188), 2021-06-10
Supplement: s1 [file s1]

Archive with 1 entries (1 files):
- agronomy-1222438-supplementary.pdf
